# Supplementary material for: Theoretical investigation of dehydration of aquated Al(OH)2+ species in aqueous solution
Source: Royal Society of Chemistry journal article supplement (doi:10.1039/b816081c), 2009-01-01
Supplement: b816081c.pdf [file b816081c.pdf]

## Electronic Supplementary Information

### Theoretical investigation of dehydration of aquated $\text{Al}(\text{OH})_2^+$ species in aqueous solution

Zhaosheng Qian, Hui Feng, Wenjing Yang, Zhenjiang Zhang, Yingjie Wang and Shuping Bi\*

School of Chemistry and Chemical Engineering, State Key Laboratory of Coordination Chemistry of China & Key Laboratory of MOE for Life Science, Nanjing University, Nanjing 210093, China

#### 1. Structures for the gas-phase species of dehydration processes of $\text{Al}(\text{H}_2\text{O})_4(\text{OH})_2^+$ and $\text{Al}(\text{H}_2\text{O})_3(\text{OH})_2^+$

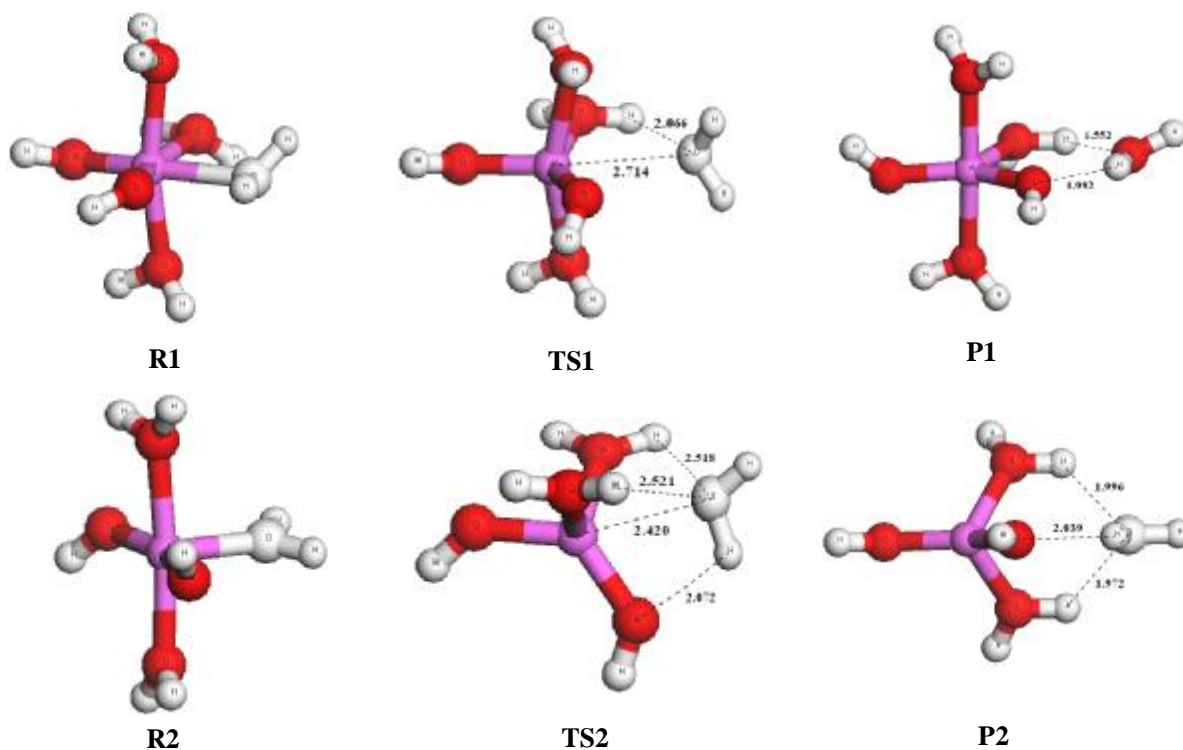

**Figure S1.** Structures of dehydration reactions of  $\text{cis-Al}(\text{H}_2\text{O})_4(\text{OH})_2^+$  and  $\text{Al}(\text{H}_2\text{O})_3(\text{OH})_2^+$  for gas-phase reaction system

## 2. Selected Structural Parameters (Å) for dehydration processes of *cis*-Al(H<sub>2</sub>O)<sub>4</sub>(OH)<sub>2</sub><sup>+</sup> and Al(H<sub>2</sub>O)<sub>3</sub>(OH)<sub>2</sub><sup>+</sup> in gas phase

**Table S1.** Selected Structural Parameters (Å) for dehydration processes of Al(H<sub>2</sub>O)<sub>4</sub>(OH)<sub>2</sub><sup>+</sup> and Al(H<sub>2</sub>O)<sub>3</sub>(OH)<sub>2</sub><sup>+</sup> in gas phase

| complex | r(Al-O <sub>I</sub> )               | r(Al-O <sub>L</sub> ) | r(H-O <sub>L</sub> ) | r(Al-O) | ∑r(Al-O) |
|---------|-------------------------------------|-----------------------|----------------------|---------|----------|
| R1      | 1.767,1.767,2.032,2.034,2.033,2.032 | -                     | -                    | 1.944   | 11.665   |
| TS1     | 1.737,1.740,2.032,1.954,1.997       | 2.714                 | 2.066                | 1.892   | 12.174   |
| P1      | 1.726,1.723,2.044,1.991,1.932       | 3.401                 | 1.992,1.552          | 1.883   | 12.817   |
| R2      | 1.724,1.723,2.006,2.006,1.935       | -                     | -                    | 1.879   | 9.394    |
| TS2     | 1.714,1.715,1.902,1.902             | 2.420                 | 2.521,2.518          | 1.808   | 9.653    |
| P2      | 1.718,1.690,1.917,1.847             | 3.039                 | 1.996,1.972          | 1.797   | 10.265   |

## 3. IRC analysis for Reaction 1 and 2

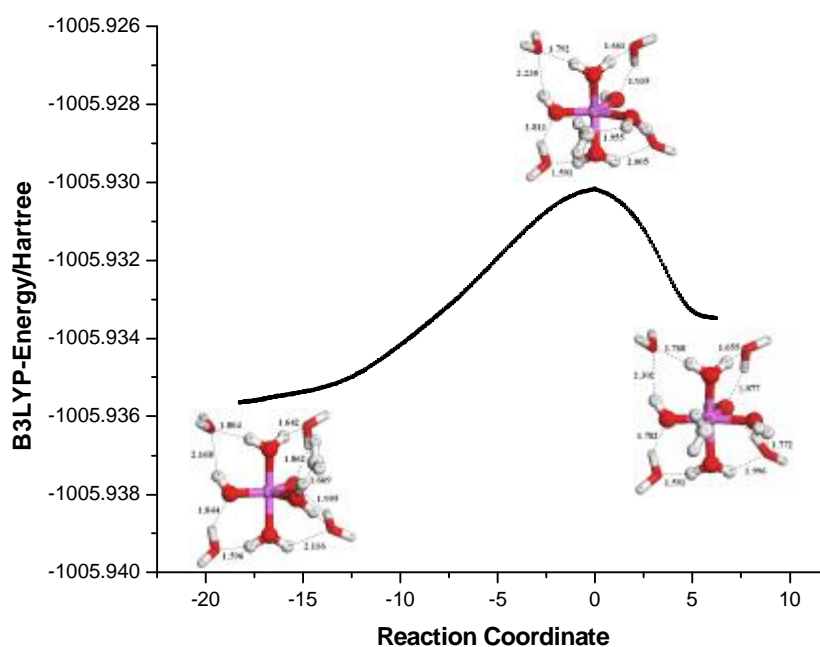

**Figure S2.** IRC analysis for Reaction 1

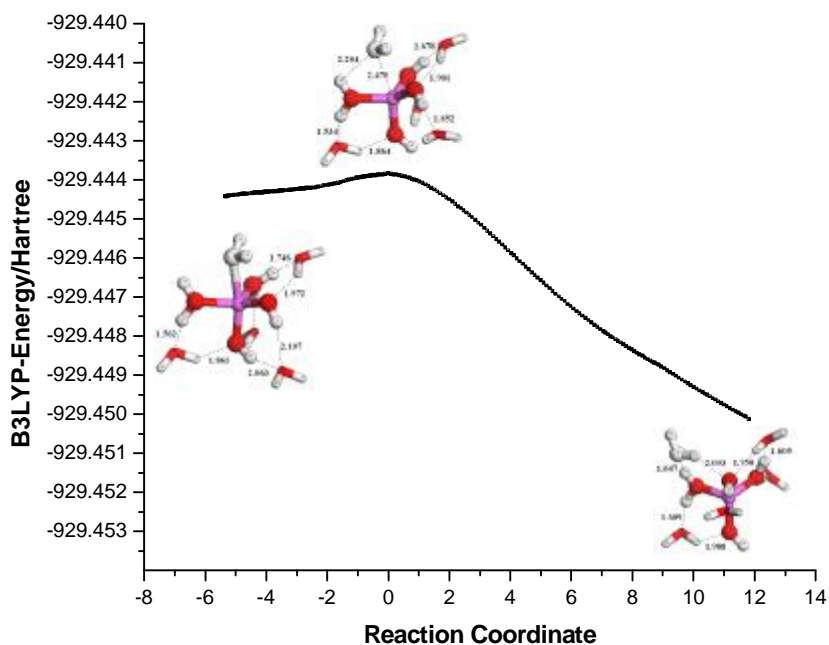

Figure S3. IRC analysis for Reaction 2

#### 4. Cartesian coordinates of the supermolecular species at B3LYP/6-311+G\*\* level

R<sub>s</sub>1

|    |             |             |             |
|----|-------------|-------------|-------------|
| O  | -1.99970000 | 0.58400000  | 0.32340000  |
| O  | 1.75000000  | -0.38190000 | 0.69570000  |
| O  | 0.29680000  | 1.73580000  | -0.38500000 |
| O  | -0.22180000 | -0.96040000 | -1.26900000 |
| O  | -0.60720000 | -1.57350000 | 1.21930000  |
| O  | -0.12490000 | 0.78440000  | 2.23630000  |
| Al | -0.09220000 | 0.09780000  | 0.22700000  |
| H  | 1.98630000  | -1.28320000 | 0.33420000  |
| H  | -0.15040000 | -0.46600000 | -2.09150000 |
| H  | -0.76490000 | -1.50590000 | 2.16820000  |
| H  | -1.35430000 | -2.05810000 | 0.79680000  |
| H  | -0.73870000 | 1.51690000  | 2.37880000  |
| H  | 0.72920000  | 1.04310000  | 2.60520000  |
| H  | 1.19910000  | 1.99540000  | -0.58860000 |
| H  | -2.60050000 | -0.13540000 | 0.05750000  |
| H  | -2.22590000 | 1.41190000  | -0.20700000 |
| H  | 2.43150000  | 0.23600000  | 0.35040000  |
| H  | -1.07080000 | 2.67870000  | -1.03110000 |
| O  | -2.04930000 | 2.68350000  | -1.14740000 |
| H  | -2.37820000 | 3.58300000  | -1.05970000 |

|   |             |             |             |
|---|-------------|-------------|-------------|
| H | -1.79840000 | -1.82950000 | -1.16700000 |
| O | -2.52530000 | -2.04050000 | -0.53310000 |
| H | -3.12410000 | -2.68480000 | -0.92440000 |
| H | 1.16360000  | -2.22550000 | -1.21810000 |
| O | 2.02860000  | -2.46440000 | -0.82380000 |
| H | 2.10580000  | -3.42270000 | -0.79230000 |
| H | 4.07770000  | 2.02360000  | -0.01910000 |
| O | 3.43530000  | 1.46370000  | -0.47140000 |
| H | 3.85200000  | 1.20550000  | -1.30300000 |

**TS<sub>s</sub>1**

|    |             |             |             |
|----|-------------|-------------|-------------|
| O  | 1.93070000  | -0.62540000 | 0.12860000  |
| O  | -1.72190000 | 0.39770000  | 0.57670000  |
| O  | -0.35290000 | -1.67050000 | -0.54970000 |
| O  | 0.25280000  | 1.17240000  | -1.35770000 |
| O  | 0.58840000  | 1.33110000  | 1.29080000  |
| O  | 0.23900000  | -0.91130000 | 2.63850000  |
| Al | 0.07210000  | -0.03470000 | -0.02550000 |
| H  | -1.98380000 | 1.32240000  | 0.30850000  |
| H  | 0.20320000  | 0.83580000  | -2.25730000 |
| H  | 0.68250000  | 0.93540000  | 2.17410000  |
| H  | 1.40090000  | 1.82300000  | 1.03990000  |
| H  | 0.90640000  | -1.59730000 | 2.75800000  |
| H  | -0.50760000 | -1.16010000 | 3.19560000  |
| H  | -1.27050000 | -1.94750000 | -0.62290000 |
| H  | 2.59440000  | 0.06060000  | -0.06070000 |
| H  | 2.14850000  | -1.47410000 | -0.37000000 |
| H  | -2.43500000 | -0.21550000 | 0.29850000  |
| H  | 0.97950000  | -2.72860000 | -1.17060000 |
| O  | 1.95580000  | -2.76450000 | -1.28000000 |
| H  | 2.25550000  | -3.66960000 | -1.15340000 |
| H  | 1.89840000  | 2.01680000  | -1.01070000 |
| O  | 2.59280000  | 2.04920000  | -0.31670000 |
| H  | 3.23890000  | 2.72610000  | -0.54380000 |
| H  | -1.15350000 | 2.48210000  | -1.13320000 |
| O  | -2.00760000 | 2.65020000  | -0.68940000 |
| H  | -2.09650000 | 3.59530000  | -0.53320000 |
| H  | -4.02770000 | -2.07070000 | 0.16220000  |
| O  | -3.45490000 | -1.52010000 | -0.38510000 |
| H  | -3.94760000 | -1.35380000 | -1.19820000 |

**P<sub>s</sub>1**

|   |             |             |             |
|---|-------------|-------------|-------------|
| O | 1.97510400  | -1.05186700 | -0.17491600 |
| O | -1.31725700 | 1.05147100  | 0.03826100  |
| O | 1.35379400  | 1.43840000  | -0.26269700 |

|    |             |             |             |
|----|-------------|-------------|-------------|
| O  | -0.01271900 | -0.72973600 | 1.69359000  |
| O  | -0.47212700 | -1.16152600 | -1.11780200 |
| O  | -2.80628900 | -1.00271200 | -2.37343100 |
| Al | 0.37598900  | 0.02365800  | 0.10162700  |
| H  | -1.95419700 | 0.83925700  | 0.77472000  |
| H  | 0.64879900  | -0.64017200 | 2.38631500  |
| H  | -1.34488900 | -1.03194000 | -1.56881200 |
| H  | -0.32101500 | -2.10781100 | -0.91553700 |
| H  | -2.94978600 | -1.27350600 | -3.28690800 |
| H  | -3.54423700 | -0.43331500 | -2.13136800 |
| H  | 0.97261400  | 2.32053400  | -0.29980900 |
| H  | 2.01637800  | -1.99688300 | 0.02426200  |
| H  | 2.87158700  | -0.61184900 | -0.29148500 |
| H  | -1.23576000 | 2.02475700  | -0.03522700 |
| H  | 3.18221100  | 1.24835100  | -0.40175800 |
| O  | 3.91319600  | 0.59562800  | -0.35136500 |
| H  | 4.54525000  | 0.79089100  | -1.05001400 |
| H  | 0.07064400  | -2.66096000 | 1.20143700  |
| O  | 0.33825800  | -3.21547300 | 0.44242500  |
| H  | 0.20709100  | -4.14066300 | 0.67507100  |
| H  | -1.69917600 | -0.30504600 | 2.35931700  |
| O  | -2.49041300 | 0.25240800  | 2.21137400  |
| H  | -3.26244400 | -0.17814300 | 2.58937300  |
| H  | -0.87488300 | 4.26234200  | -0.99509900 |
| O  | -0.67326400 | 3.72945900  | -0.21644700 |
| H  | -0.68230100 | 4.33819700  | 0.53243000  |

## R<sub>s</sub>2

|    |             |             |             |
|----|-------------|-------------|-------------|
| O  | -1.27990000 | 0.64710000  | 0.28030000  |
| O  | 1.21830000  | 0.91140000  | -1.10080000 |
| O  | -1.01290000 | -1.53650000 | -1.14200000 |
| O  | 1.53740000  | -1.59830000 | -1.26440000 |
| O  | 0.84880000  | -0.90070000 | 1.25210000  |
| Al | 0.13350000  | -0.26560000 | -0.36890000 |
| H  | 0.89470000  | 1.81640000  | -1.19610000 |
| H  | -2.02270000 | -1.45580000 | -1.00450000 |
| H  | -0.73400000 | -2.33810000 | -1.59700000 |
| H  | 2.06680000  | -1.01510000 | -1.83060000 |
| H  | 2.16310000  | -2.07700000 | -0.70410000 |
| H  | 1.79330000  | -0.62190000 | 1.35720000  |
| H  | 0.30470000  | -0.65360000 | 2.06540000  |
| H  | -1.22860000 | 1.59900000  | 0.10830000  |
| H  | -0.20540000 | 4.05120000  | -0.14810000 |
| O  | -0.48970000 | 3.33450000  | -0.72820000 |
| H  | -0.95700000 | 3.76580000  | -1.45380000 |

|   |             |             |             |
|---|-------------|-------------|-------------|
| O | -0.81850000 | 0.04520000  | 2.94110000  |
| H | -1.35410000 | 0.39920000  | 2.20460000  |
| H | -1.40470000 | -0.31140000 | 3.61630000  |
| O | 3.22910000  | 0.04010000  | 0.61680000  |
| H | 4.03890000  | 0.41010000  | 0.98310000  |
| H | 2.85050000  | 0.67860000  | -0.01950000 |
| O | -3.33800000 | -0.93670000 | -0.43020000 |
| H | -4.15730000 | -0.73610000 | -0.89420000 |
| H | -2.94050000 | -0.10550000 | -0.09100000 |

**TS<sub>s</sub>2**

|    |             |             |             |
|----|-------------|-------------|-------------|
| O  | -0.97290000 | -0.98400000 | -1.08200000 |
| O  | 1.72270000  | -0.31240000 | 0.04590000  |
| O  | -1.02360000 | -0.95530000 | 1.53020000  |
| O  | 0.80160000  | 0.66410000  | 2.34090000  |
| O  | -0.41870000 | 1.61400000  | -0.02820000 |
| Al | -0.01060000 | -0.19360000 | 0.17140000  |
| H  | 2.16690000  | -1.00770000 | -0.46920000 |
| H  | -1.84130000 | -1.52100000 | 1.29640000  |
| H  | -0.91820000 | -0.70930000 | 2.45660000  |
| H  | 1.72090000  | 0.38790000  | 2.21930000  |
| H  | 0.83140000  | 1.59820000  | 2.58030000  |
| H  | 0.40000000  | 2.18090000  | -0.08240000 |
| H  | -1.12520000 | 1.91170000  | -0.66550000 |
| H  | -0.59430000 | -1.20160000 | -1.93610000 |
| H  | 3.52230000  | -2.16680000 | -2.24900000 |
| O  | 2.92350000  | -2.33670000 | -1.51360000 |
| H  | 3.20260000  | -3.18040000 | -1.14100000 |
| O  | -2.29970000 | 2.31120000  | -1.72520000 |
| H  | -2.78390000 | 1.61640000  | -2.18540000 |
| H  | -2.87690000 | 3.08190000  | -1.68610000 |
| O  | 2.05690000  | 2.40680000  | 0.06160000  |
| H  | 2.66790000  | 2.99440000  | -0.39390000 |
| H  | 2.34360000  | 1.47970000  | -0.07830000 |
| O  | -2.90840000 | -2.14740000 | 0.39050000  |
| H  | -3.20390000 | -3.06370000 | 0.38760000  |
| H  | -2.42390000 | -1.96470000 | -0.44350000 |

**P<sub>s</sub>2**

|    |             |             |             |
|----|-------------|-------------|-------------|
| O  | 0.49130000  | 1.27910000  | -1.62090000 |
| O  | -1.47730000 | -0.60310000 | -0.06190000 |
| O  | 0.47920000  | 1.14550000  | 1.12430000  |
| O  | -1.57730000 | 0.56200000  | 2.57080000  |
| O  | 1.17320000  | -1.31010000 | -0.31880000 |
| Al | 0.06160000  | 0.15600000  | -0.37820000 |

|   |             |             |             |
|---|-------------|-------------|-------------|
| H | -2.28810000 | -0.36860000 | -0.55050000 |
| H | 0.82620000  | 2.07390000  | 0.95300000  |
| H | -0.18240000 | 1.08530000  | 1.86930000  |
| H | -1.91350000 | -0.07180000 | 1.91450000  |
| H | -1.79230000 | 0.23820000  | 3.45130000  |
| H | 0.73670000  | -2.17630000 | -0.05100000 |
| H | 2.16700000  | -1.34430000 | -0.28620000 |
| H | 0.44150000  | 1.14150000  | -2.56760000 |
| H | -4.30930000 | -0.47240000 | -2.04340000 |
| O | -3.79770000 | 0.08990000  | -1.45190000 |
| H | -4.36360000 | 0.84060000  | -1.24210000 |
| O | 3.79390000  | -1.40800000 | -0.23630000 |
| H | 4.38350000  | -1.57330000 | -0.98010000 |
| H | 4.34590000  | -1.28950000 | 0.54440000  |
| O | -0.46080000 | -3.11920000 | 0.45090000  |
| H | -0.72290000 | -4.00460000 | 0.17990000  |
| H | -1.19850000 | -2.50230000 | 0.27980000  |
| O | 1.44180000  | 3.26600000  | 0.06510000  |
| H | 1.33450000  | 4.22140000  | 0.10310000  |
| H | 1.20330000  | 2.95710000  | -0.82790000 |
